# Supplementary material for: The Potential Effect of Metformin on Cancer: An Umbrella Review
Source: Front Endocrinol (Lausanne). 2019 Sep 18;10:617. doi: 10.3389/fendo.2019.00617 (PMC6760464; doi:10.3389/fendo.2019.00617)
Supplement: Supplementary file 1 [file Table_1.docx]

**Supplementary Table 1. The detailed results of methodological quality assessment**

|  |  | AMSTAR Items | | | | | | | | | | | | | | | |  |
| --- | --- | --- | --- | --- | --- | --- | --- | --- | --- | --- | --- | --- | --- | --- | --- | --- | --- | --- |
| References | Cancer Site | 1 | 2* | 3 | 4* | 5 | 6 | 7* | 8 | 9* | 10 | 11* | 12 | 13* | 14 | 15* | 16 | Rating |
| Franciosi et al, 2013 | All cancer | Yes | No | No | PY | Yes | Yes | No | PY | Yes  Yes | No | Yes  Yes | Yes | No | No | Yes | Yes | CL |
| Lega et al, 2014 | All cancer | Yes | No | Yes | PY | Yes | Yes | No | PY | NRSI  Yes | No | NRSI  Yes | No | No | Yes | Yes | Yes | CL |
| Hu et al, 2018 | Bladder cancer | Yes | PY | No | PY | Yes | Yes | No | PY | NRSI  Yes | No | NRSI  Yes | No | No | Yes | No | Yes | CL |
| Tang et al, 2018 | Breast cancer | Yes | Yes | No | PY | Yes | Yes | No | PY | NRSI  Yes | No | NRSI  Yes | Yes | No | Yes | Yes | Yes | CL |
| Xu et al, 2015 | Breast cancer | Yes | No | No | PY | Yes | Yes | No | PY | NRSI  No | No | NRSI  Yes | No | No | Yes | Yes | Yes | CL |
| Mansourian et al, 2018 | Colorectal adenoma | Yes | No | No | PY | Yes | Yes | No | PY | NRSI  Yes | No | NRSI  Yes | No | No | Yes | Yes | Yes | CL |
| He et al, 2016 | Colorectal cancer | Yes | No | No | PY | Yes | Yes | No | PY | Yes  Yes | No | Yes  Yes | No | No | Yes | Yes | Yes | CL |
| Du et al, 2017 | Colorectal cancer | Yes | No | No | PY | Yes | Yes | No | PY | Yes  Yes | No | Yes  Yes | No | No | Yes | Yes | Yes | CL |
| Zhou et al, 2017 | Gastric cancer | Yes | No | No | PY | Yes | Yes | No | PY | Yes  Yes | No | Yes  Yes | No | No | Yes | Yes | Yes | CL |
| Chu et al, 2018 | Endometrial cancer | Yes | No | No | PY | Yes | Yes | No | PY | NRSI  Yes | No | NRSI  Yes | No | No | Yes | Yes | Yes | CL |
| Guo et al, 2017 | Endometrial cancer | Yes | No | No | PY | Yes | Yes | No | PY | NRSI  Yes | No | NRSI  Yes | No | No | No | No | Yes | CL |
| Li et al, 2016 | Ovarian cancer | Yes | No | No | PY | No | Yes | No | PY | Yes  Yes | No | Yes  Yes | No | No | Yes | Yes | Yes | CL |
|  |  |  |  |  |  |  |  |  |  |  |  |  |  |  |  |  |  |  |
| Li et al, 2017 | Kidney cancer | Yes | No | No | PY | No | No | No | PY | No  No | No | NRSI  Yes | No | No | No | Yes | Yes | CL |
| Ma et al, 2017 | Liver cancer | Yes | No | Yes | PY | Yes | Yes | No | PY | Yes  Yes | No | Yes  Yes | No | No | Yes | Yes | Yes | CL |
| Ma et al, 2016 | Liver cancer | Yes | No | No | PY | Yes | Yes | No | PY | NRSI  Yes | No | NRSI  Yes | No | No | Yes | Yes | Yes | CL |
| Nie et al, 2014 | Lung cancer | Yes | No | No | PY | Yes | Yes | No | PY | NRSI  Yes | No | NRSI  Yes | No | No | Yes | Yes | Yes | CL |
| Xin et al, 2018 | Lung cancer | Yes | No | No | PY | No | Yes | No | PY | NRSI  Yes | No | NRSI  Yes | No | No | Yes | Yes | Yes | CL |
| Hu et al, 2017 | Pancreatic cancer | Yes | No | Yes | PY | Yes | Yes | No | PY | NRSI  Yes | No | NRSI  Yes | No | No | Yes | Yes | Yes | CL |
| Zhou et al, 2017 | Pancreatic cancer | Yes | No | No | PY | Yes | Yes | No | PY | NRSI  No | No | NRSI  Yes | No | No | No | Yes | Yes | CL |
| Chen et al, 2018 | Prostate cancer | Yes | PY | No | PY | Yes | Yes | No | No | Yes  Yes | No | Yes  Yes | No | No | Yes | Yes | Yes | CL |
| Xiao et al, 2017 | Prostate cancer | Yes | No | No | PY | Yes | No | No | PY | NRSI  Yes | No | NRSI  Yes | No | No | Yes | Yes | Yes | CL |

* critical domains.

PY=partial yes; NoM=no meta-analysis; CL=critically low; RCT= randomized controlled trials; NRSI= non-randomized studies

AMSTAR Checklist 2: Shea et al. BMJ. 2017 Sep 21;358:j4008. doi: 10.1136/bmj.j4008.

1. Did the research questions and inclusion criteria for the review include the components of PICO?

The research questions and inclusion criteria for the review should include Population, Intervention, Comparator group, and Outcome.

Note: Timeframe for follow-up is optional (recommended) to get a yes.

2. Did the report of the review contain an explicit statement that the review methods were established prior to the conduct of the review and did the report justify any significant deviations from the protocol?

For Partial Yes:

The authors state that they had a written protocol or guide that included ALL the following: review question(s), a search strategy, inclusion/exclusion criteria, a risk of bias assessment.

For Yes:

As for partial yes, plus the protocol should be registered and should also have specified: a meta-analysis/synthesis plan, if appropriate, and a plan for investigating causes of heterogeneity, justification for any deviations from the protocol.

3. Did the review authors explain their selection of the study designs for inclusion in the review?

For Yes, the review should satisfy ONE of the following: explanation for including only RCTs, OR explanation for including only NRSI, OR explanation for including both RCTs and NRSI.

4. Did the review authors use a comprehensive literature search strategy?

For Partial Yes (ALL the following): searched at least 2 databases (relevant to research question), provided key word and/or search strategy, justified publication restrictions (eg, language). For Yes, should also have (all the following): searched the reference lists/bibliographies of included studies, searched trial/study registries, included/consulted content experts in the field, where relevant, searched for grey literature, conducted search within 24 months of completion of the review.

5. Did the review authors perform study selection in duplicate?

For Yes, either ONE of the following: at least two reviewers independently agreed on selection of eligible studies and achieved consensus on which studies to include, OR two reviewers selected a sample of eligible studies and achieved good agreement (at least 80 per cent), with the remainder selected by one reviewer.

6. Did the review authors perform data extraction in duplicate?

For Yes, either ONE of the following: at least two reviewers achieved consensus on which data to extract from included studies, OR two reviewers extracted data from a sample of eligible studies and achieved good agreement (at least 80 per cent), with the remainder extracted by one reviewer.

7. Did the review authors provide a list of excluded studies and justify the exclusions?

For Partial Yes: provided a list of all potentially relevant studies that were read in full text form but excluded from the review

For Yes, must also have: justified the exclusion from the review of each potentially relevant study.

8. Did the review authors describe the included studies in adequate detail?

For Partial Yes (ALL the following): described populations, described interventions, described comparators, described outcomes, described research designs.

For Yes, should also have ALL the following: described population in detail, described intervention and comparator in detail (including doses where relevant), described study’s setting, timeframe for follow-up.

9. Did the review authors use a satisfactory technique for assessing the risk of bias (RoB) in individual studies that were included in the review?

RCTs

For Partial Yes, must have assessed RoB from unconcealed allocation, and lack of blinding of patients and assessors when assessing outcomes (unnecessary for objective outcomes such as all-cause mortality).

For Yes, must also have assessed RoB from: allocation sequence that was not truly random, and selection of the reported result from among multiple measurements or analyses of a specified outcome.

NRSI

For Partial Yes, must have assessed RoB: from confounding, and from selection bias.

For Yes, must also have assessed RoB: methods used to ascertain exposures and outcomes, and selection of the reported result from among multiple measurements or analyses of a specified outcome.

10. Did the review authors report on the sources of funding for the studies included in the review?

For Yes, must have reported on the sources of funding for individual studies included in the review. Note: Reporting that the reviewers looked for this information but it was not reported by study authors also qualifies.

11. If meta-analysis was performed did the review authors use appropriate methods for statistical combination of results?

RCTs

For Yes: the authors justified combining the data in a meta-analysis, AND they used an appropriate weighted technique to combine study results and adjusted for heterogeneity if present, AND investigated the causes of any heterogeneity.

NRSI

For Yes: the authors justified combining the data in a meta-analysis, AND they used an appropriate weighted technique to combine study results, adjusting for heterogeneity if present, AND they statistically combined effect estimates from NRSI that were adjusted for confounding, rather than combining raw data, or justified combining raw data when adjusted effect estimates were not available, AND they reported separate summary estimates for RCTs and NRSI separately when both were included in the review.

12. If meta-analysis was performed, did the review authors assess the potential impact of RoB in individual studies on the results of the meta-analysis or other evidence synthesis?

For Yes: included only low risk of bias RCTs, OR, if the pooled estimate was based on RCTs and/or NRSI at variable RoB, the authors performed analyses to investigate possible impact of RoB on summary estimates of effect.

13. Did the review authors account for RoB in individual studies when interpreting/discussing the results of the review?

For Yes: included only low risk of bias RCTs, OR, if RCTs with moderate or high RoB, or NRSI were included the review provided a discussion of the likely impact of RoB on the results.

14. Did the review authors provide a satisfactory explanation for, and discussion of, any heterogeneity observed in the results of the review?

For Yes: there was no significant heterogeneity in the results, OR if heterogeneity was present the authors performed an investigation of sources of any heterogeneity in the results and discussed the impact of this on the results of the review.

15. If they performed quantitative synthesis did the review authors carry out an adequate investigation of publication bias (small study bias) and discuss its likely impact on the results of the review?

For Yes: performed graphical or statistical tests for publication bias and discussed the likelihood and magnitude of impact of publication bias.

16. Did the review authors report any potential sources of conflict of interest, including any funding they received for conducting the review?

For Yes: the authors reported no competing interests, OR the authors described their funding sources and how they managed potential conflicts of interest.

**Rating overall confidence in the results of the review**

High: No or one non-critical weakness: the systematic review provides an accurate and comprehensive summary of the results of the available studies that address the question of interest.

Moderate: More than one non-critical weakness*: the systematic review has more than one weakness but no critical flaws. It may provide an accurate summary of the results of the available studies that were included in the review.

Low: One critical flaw with or without non-critical weaknesses: the review has a critical flaw and may not provide an accurate and comprehensive summary of the available studies that address the question of interest.

Critically low: More than one critical flaw with or without non-critical weaknesses: the review has more than one critical flaw and should not be relied on to provide an accurate and comprehensive summary of the available studies.

*Multiple non-critical weaknesses may diminish confidence in the review and it may be appropriate to move the overall appraisal down from moderate to low confidence.
